# Supplementary material
Source: MDPI journal article supplement (https://www.mdpi.com/2673-7655/1/2/7)
Supplement: s1 [file s1]

**Table S1. List of material used in the study**

| <b>Entr<br/>y</b> | <b>NAME</b>                      | <b>Breeder's ID</b> | <b>DOI</b>     | <b>Groups</b> | <b>Country</b> |
|-------------------|----------------------------------|---------------------|----------------|---------------|----------------|
| 1                 | Kalak robot sangi                | IW-AFG-2017-8       | 10.18730/KASBJ | WLR-AFG       | AFG            |
| 2                 | Omid bedon_e_ dasa               | IW-AFG-2017-5       | 10.18730/KAS8F | WLR-AFG       | AFG            |
| 3                 | Dandan shotur                    | IW-AFG-2017-11      | 10.18730/KASEN | WLR-AFG       | AFG            |
| 4                 | Surkhak mahali                   | IW-AFG-2017-2       | 10.18730/KAS5C | WLR-AFG       | AFG            |
| 5                 | Shanaze                          | IW-AFG-2017-12      | 10.18730/KASFP | WLR-AFG       | AFG            |
| 6                 | Nesh shotor                      | IW-AFG-2017-17      | 10.18730/KASMV | WLR-AFG       | AFG            |
| 7                 | Safedak kalak bedon_e_ dasa      | IW-AFG-2017-4       | 10.18730/KAS7E | WLR-AFG       | AFG            |
| 8                 | Kalak                            | IW-AFG-2017-18      | 10.18730/KASNW | WLR-AFG       | AFG            |
| 9                 | Roshan safed khosha              | IW-AFG-2017-14      | 10.18730/KASHR | WLR-AFG       | AFG            |
| 10                | Dandan                           | IW-AFG-2017-13      | 10.18730/KASGQ | WLR-AFG       | AFG            |
| 11                | Zardcha kalak robot sangi        | IW-AFG-2017-9       | 10.18730/KASCK | WLR-AFG       | AFG            |
| 12                | Omid kalak robot sangi           | IW-AFG-2017-15      | 10.18730/KASJS | WLR-AFG       | AFG            |
| 13                | Lalmi bor khosha                 | IW-AFG-2017-10      | 10.18730/KASDM | WLR-AFG       | AFG            |
| 14                | Kalak bor khosha                 | IW-AFG-2017-3       | 10.18730/KAS6D | WLR-AFG       | AFG            |
| 15                | Omid sorkh khosha bedon_e_ dasah | IW-AFG-2017-6       | 10.18730/KAS9G | WLR-AFG       | AFG            |
| 16                | Kalak sorkh khosha               | IW-AFG-2017-19      | 10.18730/KASPX | WLR-AFG       | AFG            |
| 17                | Attaye                           | IW-AFG-2017-1       | 10.18730/KAS4B | WLR-AFG       | AFG            |
| 18                | Saffroni                         | IW-AFG-2017-20      | 10.18730/KASQY | WLR-AFG       | AFG            |
| 19                | Sorkhak watani lalmi             | IW-AFG-2017-16      | 10.18730/KASKT | WLR-AFG       | AFG            |
| 20                | Lalmi safedak                    | IW-AFG-2017-7       | 10.18730/KASAH | WLR-AFG       | AFG            |
| 21                | Sardari biotype                  | IW-IRN-2017-7       | 10.18730/KARQ= | WLR-IRAN      | IRN            |
| 22                | Sardari biotype                  | IW-IRN-2017-10      | 10.18730/KART1 | WLR-IRAN      | IRN            |
| 23                | Sardari biotype                  | IW-IRN-2017-13      | 10.18730/KARX4 | WLR-IRAN      | IRN            |
| 24                | Khosheh ablaq                    | IW-IRN-2017-3       | 10.18730/KARKZ | WLR-IRAN      | IRN            |
| 25                | White spike                      | IW-IRN-2017-2       | 10.18730/KARJY | WLR-IRAN      | IRN            |
| 26                | Sardari biotype                  | IW-IRN-2017-14      | 10.18730/KARY5 | WLR-IRAN      | IRN            |
| 27                | Sardari biotype                  | IW-IRN-2017-17      | 10.18730/KAS18 | WLR-IRAN      | IRN            |
| 28                | Sardari biotype                  | IW-IRN-2017-15      | 10.18730/KARZ6 | WLR-IRAN      | IRN            |

|    |                  |                       |                 |          |     |
|----|------------------|-----------------------|-----------------|----------|-----|
| 29 | Khosheh qermez   | IW-IRN-2017-1         | 10.18730/KARHX  | WLR-IRAN | IRN |
| 30 | Sardari biotype  | IW-IRN-2017-9         | 10.18730/KARS0  | WLR-IRAN | IRN |
| 31 | Sardari biotype  | IW-IRN-2017-12        | 10.18730/KARW3  | WLR-IRAN | IRN |
| 32 | Sardari biotype  | IW-IRN-2017-16        | 10.18730/KAS07  | WLR-IRAN | IRN |
| 33 | Sardari biotype  | IW-IRN-2017-8         | 10.18730/KARRU  | WLR-IRAN | IRN |
| 34 | Sardari biotype  | IW-IRN-2017-6         | 10.18730/KARP\$ | WLR-IRAN | IRN |
| 35 | Sardari biotype  | IW-IRN-2017-19        | 10.18730/KAS3A  | WLR-IRAN | IRN |
| 36 | Siahdaneh        | IW-IRN-2017-5         | 10.18730/KARN~  | WLR-IRAN | IRN |
| 37 | Qzil khosheh     | IW-IRN-2017-4         | 10.18730/KARM*  | WLR-IRAN | IRN |
| 38 | Sardari biotype  | IW-IRN-2017-18        | 10.18730/KAS29  | WLR-IRAN | IRN |
| 39 | Sardari biotype  | IW-IRN-2017-11        | 10.18730/KARV2  | WLR-IRAN | IRN |
| 40 | Cirpuz           | IW875-2012-11TR44-0YM | 10.18730/KAWB3  | WLR-TUR  | TUR |
| 41 | Kunduru          | IW819-2012-26TR44-0YM | 10.18730/KAW80  | WLR-TUR  | TUR |
| 42 | Sorgül           | IW1338-2014-3TR47-0YM | 10.18730/KAR7K  | WLR-TUR  | TUR |
| 43 | Haciali          | IW1394-2014-1TR47-0YM | 10.18730/KARCR  | WLR-TUR  | TUR |
| 44 | Akyarnaz         | IW133-2009-1TR42-0YM  | 10.18730/KAR4G  | WLR-TUR  | TUR |
| 45 | Akbugday         | IW674-2012-9TR45-0YA  | 10.18730/KAQKU  | WLR-TUR  | TUR |
| 46 | Kirmizi kunduru  | IW836-2012-5TR44-0YM  | 10.18730/KAQZB  | WLR-TUR  | TUR |
| 47 | Akbugday         | IW680-2012-14TR45-0YA | 10.18730/KAW3*  | WLR-TUR  | TUR |
| 48 | Siverek          | IW866-2012-12TR44-0YM | 10.18730/KAWA2  | WLR-TUR  | TUR |
| 49 | Calibasan        | IW694-2012-17TR45-0YA | 10.18730/KAQN1  | WLR-TUR  | TUR |
| 50 | Şergun           | IW1397-2014-1TR47-0YM | 10.18730/KARET  | WLR-TUR  | TUR |
| 51 | Kilciksiz bugday | IW708-2012-8TR45-0YA  | 10.18730/KAWC4  | WLR-TUR  | TUR |
| 52 | Cakmak           | IW809-2012-21TR44-0YM | 10.18730/KAW7U  | WLR-TUR  | TUR |
| 53 | Goderedi         | IW226-2010-6TR70-0YM  | 10.18730/KAR3F  | WLR-TUR  | TUR |
| 54 | Hinta            | IW1330-2014-1TR47-0YM | 10.18730/KAR8M  | WLR-TUR  | TUR |
| 55 | Kunduru          | IW819-2012-13TR44-0YM | 10.18730/KAQV7  | WLR-TUR  | TUR |
| 56 | Sorgül           | IW1344-2014-1TR47-0YM | 10.18730/KARGW  | WLR-TUR  | TUR |
| 57 | Ormece           | IW397-2012-26TR60-0YA | 10.18730/KAW5\$ | WLR-TUR  | TUR |
| 58 | Cam bugdayi      | IW373-2012-5TR60-0YA  | 10.18730/KAW4~  | WLR-TUR  | TUR |
| 59 | Ormece           | IW397-2012-18TR60-0YA | 10.18730/KAQP2  | WLR-TUR  | TUR |

|    |                                  |                       |                |         |     |
|----|----------------------------------|-----------------------|----------------|---------|-----|
| 60 | Kirmizi buğday                   | IW1331-2014-1TR47-0YM | 10.18730/KAR5H | WLR-TUR | TUR |
| 61 | Agbugday                         | IW890-2012-6TR44-0YM  | 10.18730/KAQQ3 | WLR-TUR | TUR |
| 62 | Akbugday                         | IW690-2012-8TR45-0YA  | 10.18730/KAR1D | WLR-TUR | TUR |
| 63 | Sorik                            | IW1327-2014-1TR47-0YM | 10.18730/KARAP | WLR-TUR | TUR |
| 64 | Cam bugdayi (kirmizi)            | IW419-2012-10TR60-0YA | 10.18730/KAQG~ | WLR-TUR | TUR |
| 65 | Koca bugday                      | IW100-2009-4TR42-0YM  | 10.18730/KAWD5 | WLR-TUR | TUR |
| 66 | Haciali                          | IW1394-2014-2TR47-0YM | 10.18730/KARDS | WLR-TUR | TUR |
| 67 | Uveyik bugdayi                   | IW409-2012-12TR60-0YA | 10.18730/KAW2Z | WLR-TUR | TUR |
| 68 | Agsunteri                        | IW368-2012-7TR60-0YA  | 10.18730/KAQHŞ | WLR-TUR | TUR |
| 69 | Ormece                           | IW407-2012-5TR60-0YA  | 10.18730/KAQM0 | WLR-TUR | TUR |
| 70 | Cirpuz                           | IW875-2012-3TR44-0YM  | 10.18730/KAR2E | WLR-TUR | TUR |
| 71 | Kirmizi buğday                   | IW1339-2014-1TR47-0YM | 10.18730/KAR6J | WLR-TUR | TUR |
| 72 | Cakmak                           | IW809-2012-23TR44-0YM | 10.18730/KAQS5 | WLR-TUR | TUR |
| 73 | Cirpuz                           | IW877-2012-4TR44-0YM  | 10.18730/KAQX9 | WLR-TUR | TUR |
| 74 | Kirmizi buğday                   | IW1385-2014-1TR47-0YM | 10.18730/KARFV | WLR-TUR | TUR |
| 75 | Zinebe                           | IW1326-2014-2TR47-0YM | 10.18730/KAR9N | WLR-TUR | TUR |
| 76 | Kunduru                          | IW821-2012-13TR44-0YM | 10.18730/KAQR4 | WLR-TUR | TUR |
| 77 | Cam bugdayi (beyaz)              | IW385-2012-2TR60-0YA  | 10.18730/KAQJ= | WLR-TUR | TUR |
| 78 | Cirpuz                           | IW895-2012-3TR44-0YM  | 10.18730/KAR0C | WLR-TUR | TUR |
| 79 | Siverek                          | IW863-2012-17TR44-0YM | 10.18730/KAQW8 | WLR-TUR | TUR |
| 80 | Cakmak                           | IW803-2012-24TR44-0YM | 10.18730/KAQT6 | WLR-TUR | TUR |
| 81 | Kirmizi kunduru                  | IW836-2012-2TR44-0YM  | 10.18730/KAQYA | WLR-TUR | TUR |
| 82 | Haciali                          | IW1394-2014-4TR47-0YM | 10.18730/KARBQ | WLR-TUR | TUR |
| 83 | Cirpuz                           | IW877-2012-2TR44-0YM  | 10.18730/KAW91 | WLR-TUR | TUR |
| 84 | Polatli                          | IW806-2012-2TR44-0YM  | 10.18730/KAW6= | WLR-TUR | TUR |
| 85 | Bezostaya                        | LC-IR-1               | 10.18730/KATVX | MG-IRR  | RUS |
| 86 | Kate a-1                         | LC-IR-2               | 10.18730/KATXZ | MG-IRR  | TUR |
| 87 | Konya 2002                       | LC-IR-3               | 10.18730/KATY* | MG-IRR  | TUR |
| 88 | Nacibey                          | LC-IR-4               | 10.18730/KASW= | MG-SA   | TCI |
| 89 | 38ibwsn-97/Destin                | TCI091043             | 10.18730/KAV96 | MG-IRR  | TCI |
| 90 | Eskina-7/3/Nemura/Crdn//78014-40 | TCI061006             | 10.18730/KAV74 | MG-IRR  | TCI |

|     |                                                                                                                    |                |                 |        |     |
|-----|--------------------------------------------------------------------------------------------------------------------|----------------|-----------------|--------|-----|
| 91  | Copper/7/Zcl/3/Pgfn//Cno67/Sn64/4/Seri/5/Ua.2837/6/<br>Attila/3*Bcn                                                | TCI071181      | 10.18730/KAVFC  | MG-IRR | TCI |
| 92  | B1551-Wh/Ks94u326/3/F10s-1//Stozher/Karl/4/F10s-<br>1//Stozher/Karl                                                | TCI092565      | 10.18730/KAV1=  | MG-IRR | TCI |
| 93  | Agri/Nac//Kauz/3/1d13.1/Mlt/4/Atay/Galvez87//Shark-1                                                               | TCI091606      | 10.18730/KAV2U  | MG-IRR | TCI |
| 94  | Cmh84.168/4/Tast/Sprw//Zar/3/Atay/Galvez87                                                                         | TCI071028      | 10.18730/KAVHE  | MG-IRR | TCI |
| 95  | Mt0419/Destin//Bonito-36                                                                                           | TCI092341      | 10.18730/KATZ~  | MG-IRR | TCI |
| 96  | Tam200/3/F60314.76/Mrl//Cno79/4/84.40022/5/<br>Agri/Nac//Kauz/3/1d13.1                                             | TCI071150      | 10.18730/KAVJF  | MG-IRR | TCI |
| 97  | Pyn*2/Co725052/3/Kauz*2/Yaco//Kauz/4/Kria                                                                          | TCI091614      | 10.18730/KAVB8  | MG-IRR | TCI |
| 98  | Croc_1/Ae.Squarrosa(205)//Kauz/3/Lufer/4/Ks97p0630-4-<br>5/Cm95560//X920879-C15-1/3/X84w063-9-18/U1324-25-1-4-.... | TCI091583      | 10.18730/KAVC9  | MG-IRR | TCI |
| 99  | Babax/Lr42//Babax*2/3/Vivitsi/4/Agri/Nac//Attila                                                                   | TCI091009      | 10.18730/KAV85  | MG-IRR | TCI |
| 100 | Orh010083/Ahmetaga                                                                                                 | TCI091718      | 10.18730/KAV63  | MG-IRR | TCI |
| 101 | Pantheon/Bluegil-2/5/Agri/Bjy//Vee/3/Bul6687.12/4/F6038w12.1                                                       | TCI091450      | 10.18730/KAVGD  | MG-IRR | TCI |
| 102 | F4141-W-1-1/Pastor//Pyn/Bau/4/Vorona//Milan/<br>Sha7/3/Mv17/5/Dorade-5                                             | TCI092289      | 10.18730/KAV41  | MG-IRR | TCI |
| 103 | Citari-9/Mv18-2000//Starshina                                                                                      | TCI072102      | 10.18730/KAVEB  | MG-IRR | TCI |
| 104 | Babax/Lr42//Babax*2/3/Kuruku/4/Tx96v2427                                                                           | TCI091085      | 10.18730/KAVA7  | MG-IRR | TCI |
| 105 | T88/2180//T811//Kristadora/3/Shark/F4105w2.1                                                                       | TCI092010      | 10.18730/KAV0\$ | MG-IRR | TCI |
| 106 | T136//T812*2/Karl/3/Zubkov/3/Agri/Nac//Attila                                                                      | TCI092349      | 10.18730/KAVDA  | MG-IRR | TCI |
| 107 | Tam200*2/Mo88//Kamb1*2/Kukuna/3/Sw89-3218/<br>Vorona                                                               | CMSA06WM00019T | 10.18730/KAV52  | MG-IRR | TCI |
| 108 | Almaly//Pbw343/Pastor                                                                                              | CMWS06MI00015S | 10.18730/KAVPK  | MG-IRR | MEX |
| 109 | Krasnovodopadskaya-25//Pbw343*2/Kukuna                                                                             | CGWS05B00038S  | 10.18730/KAVMH  | MG-IRR | MEX |
| 110 | Intensivnaya/Kukuna                                                                                                | CGWS04WM00049S | 10.18730/KAVQM  | MG-IRR | MEX |
| 111 | Intensivnaya/Kkts                                                                                                  | CGWS05B00007S  | 10.18730/KAVKG  | MG-IRR | MEX |
| 112 | Grk79//Inqalab 91*2/Tukuru                                                                                         | CGWS05B00063S  | 10.18730/KAVNJ  | MG-IRR | MEX |
| 113 | Mv Nemere                                                                                                          | TCI161230      | 10.18730/KAVVR  | MG-IRR | HUN |
| 114 | Mv Sed                                                                                                             | TCI161229      | 10.18730/KAVTQ  | MG-IRR | HUN |
| 115 | Retezat                                                                                                            | TCI150889      | 10.18730/KAVSP  | MG-IRR | ROM |
| 116 | Partener                                                                                                           | TCI150888      | 10.18730/KAVRN  | MG-IRR | ROM |

|     |                                                                                                                 |                |                 |        |     |
|-----|-----------------------------------------------------------------------------------------------------------------|----------------|-----------------|--------|-----|
| 117 | T-153                                                                                                           | TCI150948      | 10.18730/KAW1Y  | MG-IRR | USA |
| 118 | Hatcher/Ks03hw12-1//Nudakota                                                                                    | X062245        | 10.18730/KAV30  | MG-IRR | USA |
| 119 | Art/Ks990494-11-~O//Ks06o3a~36                                                                                  | KS061426K-1    | 10.18730/KAVWS  | MG-IRR | USA |
| 120 | Tx00d1390/Ronl//Ks990159-3-~7                                                                                   | KS060041-M-1   | 10.18730/KAVZW  | MG-IRR | USA |
| 121 | Fuller/Overley//Ks980554-12-~9                                                                                  | KS061193K-1    | 10.18730/KAVYV  | MG-IRR | USA |
| 122 | Ks061880m-3                                                                                                     |                | 10.18730/KAW0X  | MG-IRR | USA |
| 123 | O3a-B8//Wbll 1*2/Kukun/3/Fuller                                                                                 | KS061278K-1    | 10.18730/KAVXT  | MG-IRR | USA |
| 124 | Nd643/2*Waxwing/4/Tam200/Kauz/3/Agri/Bjy//Vee                                                                   | TCI091080      | 10.18730/KAT02  | MG-SA  | TCI |
| 125 | Gerek                                                                                                           | LC-SA-1        | 10.18730/KASRZ  | MG-SA  | TUR |
| 126 | Karahan-99                                                                                                      | LC-SA-2        | 10.18730/KAST~  | MG-SA  | TUR |
| 127 | Mufitbey                                                                                                        | LC-SA-3        | 10.18730/KASS*  | MG-SA  | TUR |
| 128 | Sonmez                                                                                                          | LC-SA-4        | 10.18730/KASV\$ | MG-SA  | TCI |
| 129 | Bilinmiyen96.55/7/Zcl/3/Pgfn//Cno67/Sn64/4/Seri/5/<br>Ua.2837/6/Attila/3*Bcn                                    | TCI071122      | 10.18730/KAT35  | MG-SA  | TCI |
| 130 | Vorona//Pri/Vee#6/3/Kauz/3/*2/Yaco//Kauz//Pantheon/<br>Bluegil-2                                                | TCI091623      | 10.18730/KAT8A  | MG-SA  | TCI |
| 131 | Ca8055/4/Romtast/Bon/3/Dibo//Su92/Ci13645/5/Agri/Bjy//<br>Veas/6/Ks9468/Nwt//Ark/3/Pastor/7/Ye2453//Ppbb68/Chrc | TCI092317      | 10.18730/KAT46  | MG-SA  | TCI |
| 132 | Tam200/3/F60314.76/Mrl//Cno79/4/84.40022/5/<br>Agri/Nac//Kauz/3/1d13.1                                          | TCI071150      | 10.18730/KATAC  | MG-SA  | TCI |
| 133 | Vorona//Milan/Sha7/3/Mv17/4/Atay/Galvez87//Shark-1                                                              | TCI091334      | 10.18730/KAT9B  | MG-SA  | TCI |
| 134 | Temporaleram87*2/4/Hd2281/Trap#1/3/Kauz*2/<br>Trap//Kauz/5/Steklovidnaya24/6/F10s-1//Stozher/Karl               | TCI092011      | 10.18730/KASXU  | MG-SA  | TCI |
| 135 | Zander-17//Saulesku#26/Parus                                                                                    | TCI051323      | 10.18730/KAT13  | MG-SA  | TCI |
| 136 | Es14/Sitta//Agri/Nac/5/Trap#1/Yaco/3/Kauz*2/Trap//<br>Kauz/4/Kinaci9127/Id800994.W/Falke                        | TCI091607      | 10.18730/KASZ1  | MG-SA  | TCI |
| 137 | Star/Bwd//Atay/Galvez87                                                                                         | TCI071243      | 10.18730/KASY0  | MG-SA  | TCI |
| 138 | Ks00f5-14-7/Eureka//Zargana-4                                                                                   | TCI072219      | 10.18730/KAT57  | MG-SA  | TCI |
| 139 | Sultan95/Atilla//Zargana-6                                                                                      | TCI071290      | 10.18730/KAT79  | MG-SA  | TCI |
| 140 | Shark/F4105w2.1//Chakinskaya306                                                                                 | OCW05S1253S    | 10.18730/KAT68  | MG-SA  | TCI |
| 141 | Azar2/78zhong291-64                                                                                             | TCI161269      | 10.18730/KATFH  | MG-SA  | IRN |
| 142 | Spartanka//Pbw343*2/Kukuna                                                                                      | CGWS04WM00059S | 10.18730/KATDF  | MG-SA  | MEX |

|     |                                                       |                |                |       |     |
|-----|-------------------------------------------------------|----------------|----------------|-------|-----|
| 143 | Grk79//Pbw343*2/Kukuna                                | CGWS05B00064S  | 10.18730/KATBD | MG-SA | MEX |
| 144 | Karlygash*2/Tukuru                                    | CMWS07MI00008T | 10.18730/KATEG | MG-SA | MEX |
| 145 | Sanzar-8/Tukuru                                       | CGWS04WM00009S | 10.18730/KATCE | MG-SA | MEX |
| 146 | De9//Inqalab 91*2/Tukuru/3/308.02.2/Weaver//362k2.121 | CMSA06WM00070T | 10.18730/KAT24 | MG-SA | MEX |
| 147 | Co050337-2/Byrd                                       | CO11D1353      | 10.18730/KATNQ | MG-SA | USA |
| 148 | Ks061860m-3                                           | TCI161147      | 10.18730/KATRT | MG-SA | USA |
| 149 | Or1/Santa Fe/3/Overley*3/Amadina//Ks990011~27         | KS050278M-1    | 10.18730/KATQS | MG-SA | USA |
| 150 | Fuller/Overley//Ks980554-12~9                         | KS061193K-2    | 10.18730/KATHK | MG-SA | USA |
| 151 | X031102-6-4/Ok00611w//Ks98w0512-2~4                   | KS061880M-3    | 10.18730/KATKN | MG-SA | USA |
| 152 | Ks090120c*-25                                         | TCI161154      | 10.18730/KATTW | MG-SA | USA |
| 153 | Ks010567-4-2/Ks980512-11                              | KS060695K-7    | 10.18730/KATGJ | MG-SA | USA |
| 154 | Ars97135-9/O3a-B4//Ks06o3a~49                         | KS061470K-2    | 10.18730/KATPR | MG-SA | USA |
| 155 | Ks080448*C-102                                        | TCI161153      | 10.18730/KATSV | MG-SA | USA |
| 156 | Ocw00m618s-2b/Ks020482tm~3//Nuhills                   | KS061705M-11   | 10.18730/KATMP | MG-SA | USA |
| 157 | Ars97135-9/O3a-B4//Ks06o3a~49                         | KS061470M-4    | 10.18730/KATJM | MG-SA | USA |

**Table S2. Names and characteristics of the main morphotypes of *Triticum aestivum* ssp. *aestivum* and *T. turgidum* ssp. *durum*.**

| Morphotype designation by species†      |                                      | Status of morphotype traits |                  |             |             |
|-----------------------------------------|--------------------------------------|-----------------------------|------------------|-------------|-------------|
| <i>T. aestivum</i> ssp. <i>aestivum</i> | <i>T. turgidum</i> ssp. <i>durum</i> | Presence of awns            | Glume pubescence | Glume color | Grain color |
| <i>albidum</i>                          | <i>candicans</i>                     | No                          | No               | White       | White       |
| <i>lutescens</i>                        | <i>schechurdinii</i>                 | No                          | No               | White       | Red         |
| <i>alborubrum</i>                       | <i>subastrale</i>                    | No                          | No               | Red         | White       |
| <i>milturum</i>                         | <i>stebutii</i>                      | No                          | No               | Red         | Red         |
| <i>leucospermum</i>                     | <i>muticovalenciae</i>               | No                          | Yes              | White       | White       |
| <i>velutinum</i>                        | <i>muticinazillennse</i>             | No                          | Yes              | White       | Red         |
| <i>delfi</i>                            | <i>muticitalicum</i>                 | No                          | Yes              | Red         | White       |
| <i>pyrotrix</i>                         |                                      | No                          | Yes              | Red         | Red         |
| <i>greacum</i>                          | <i>leucurum</i>                      | Yes                         | No               | White       | White       |
| <i>erythrospermum</i>                   | <i>affine</i>                        | Yes                         | No               | White       | Red         |
| <i>erythroleucon</i>                    | <i>hordeiforme</i>                   | Yes                         | No               | Red         | White       |
| <i>ferrugineum</i>                      | <i>murciense</i>                     | Yes                         | No               | Red         | Red         |
| <i>meridionale</i>                      | <i>valenciae</i>                     | Yes                         | Yes              | White       | White       |
| <i>hostianum</i>                        | <i>durum</i>                         | Yes                         | Yes              | White       | Red         |
| <i>turcicum</i>                         | <i>italicum</i>                      | Yes                         | Yes              | Red         | White       |
| <i>barbarossa</i>                       | <i>aegyptiacum</i>                   | Yes                         | Yes              | Red         | Red         |

† spikes with black awns will be additionally distinguished by the prefix *pseudo*- added to the morphotype designation.

**Table S3. The list of KASP markers used in the study.**

| #  | Gene                         | Marker ID                   |
|----|------------------------------|-----------------------------|
| 1  | 1RS:1BL                      | wMAS000011                  |
| 2  | Drought/salinity tolerance   | Dreb1_JC_3BL                |
| 3  | 1-feh-w3                     | 1fehw3                      |
| 4  | Ppd-A1                       | Cdex5-6ID                   |
| 5  | Ppd-A1                       | GS100-1027ID                |
| 6  | Ppd-A1                       | GS105-1117ID                |
| 7  | Ppd-B1                       | TaPpdBJ003                  |
| 8  | Ppd-D1                       | TaPpdDD001                  |
| 9  | Vrn-A1                       | Exon7_C/T_Vrn-A1            |
| 10 | Vrn-A1                       | Vrn1_new                    |
| 11 | Vrn-A1                       | Vrn-A1_9K0001               |
| 12 | Vrn-B1                       | wMAS000036                  |
| 13 | Vrn-B1                       | wMAS000037                  |
| 14 | Vrn-D1                       | Vrn-D1-D1a_A                |
| 15 | PRR-A1                       | PRR73A1-9IND                |
| 16 | PRR-B1                       | PRR73B1-4558                |
| 17 | Rht-B1                       | Rht-B1_160IND               |
| 18 | Rht-B1                       | Rht-B1_197IND               |
| 19 | Rht-B1                       | wMAS000001                  |
| 20 | Rht-D1                       | Rht-D1_SNP                  |
| 21 | Sus2-2B                      | wMAS000021                  |
| 22 | TaElf3-B1/Ppd-B2             | TaFT3-B1_Kasp1              |
| 23 | TaElf3-D1                    | FT3-Exon4_A/G               |
| 24 | TaMOT1-D1                    | TaMOT1-D1_KASP1             |
| 25 | TaTOE1-B1/Ppd-B3             | TaTOE1-B1_KASP1             |
| 26 | ISBW1-ISBW1-GY-QTL-CANDIDATE | wsnp_Ex_c2526_4715978       |
| 27 | ISBW2-GY-QTL-CANDIDATE       | Kukri_c3243_1065            |
| 28 | ISBW3-BM-QTL-CANDIDATE       | TA004946-0577               |
| 29 | ISBW5-TKW-QTL-CANDIDATE      | BS00057445_51               |
| 30 | ISBW6-GPS-QTL-CANDIDATE      | Kukri_c9898_1618            |
| 31 | ISBW7-GPS-QTL-CANDIDATE      | wsnp_Ex_rep_c66324_64493429 |
| 32 | ISBW9-SM2-QTL-CANDIDATE      | Excalibur_c71712_180        |
| 33 | ISBW10-SM2-QTL-CANDIDATE     | BS00076246_51               |
| 34 | ISBW11-GY-QTL-CANDIDATE      | wsnp_Ex_c12812_20324622     |
| 35 | 2DLcQTL-FHB                  | IWB44589                    |
| 36 | 2DLcQTL-FHB                  | IWB28643                    |
| 37 | Cre8                         | Cre8_SNP                    |
| 38 | Lr14a                        | ubw14                       |
| 39 | Lr34                         | Lr34_TCCIND                 |
| 40 | Lr37/Yr17/Sr38               | VPM_SNP                     |
| 41 | Lr46                         | Lr46_JF2-2A_AL1             |
| 42 | Lr67                         | TM4_67                      |



|    |                     |                         |
|----|---------------------|-------------------------|
| 43 | Lr68                | Lr68-2                  |
| 44 | Lr9                 | Wsnp1Lr9                |
| 45 | Nematode resistance | Rlnn1_SNP2_JC           |
| 46 | Pch1                | wMAS000023              |
| 47 | QTL nematodes       | wsnp_BE443588A_Ta_2_1   |
| 48 | QTL nematodes       | RAC875_c13116_943       |
| 49 | QTL nematodes       | Excalibur_c18966_804    |
| 50 | QTL nematodes       | Tdurum_contig10380_87   |
| 51 | QTL nematodes       | wsnp_BE426418A_Ta_2_1   |
| 52 | QTL nematodes       | Tdurum_contig12008_803  |
| 53 | QTL nematodes       | Excalibur_c20277_483    |
| 54 | QTL nematodes       | Tdurum_contig82236_117  |
| 55 | QTL nematodes       | wsnp_Ex_c55245_57821389 |
| 56 | QTL nematodes       | Excalibur_c78724_434    |
| 57 | QTL nematodes       | Bobwhite_rep_c66630_331 |
| 58 | Sbm1                | wMAS000016              |
| 59 | Sr2                 | wMAS000005_sr2          |
| 60 | Sr36/Pm6            | wMAS000015_sr36         |
| 61 | SrCad, Sr42, SrTmp  | IWB31561                |
| 62 | Sr24                | Kukri_c22857_496        |
| 63 | Tsn1                | Tsn1                    |
| 64 | Yr57                | BS00062676              |
| 65 | Fhb1                | Fhb1_KSU_AL1            |
| 66 | CWI-4A              | CWI_4A_1523             |
| 67 | TaCKX-D1            | TaCKX-D1                |
| 68 | TaGASR7-A1          | TaGASR                  |
| 69 | TaGs3-D1            | TaGS-D1                 |
| 70 | TaGS5-A1            | GS5-2334-SNP            |
| 71 | TaSus1-7B           | Sus1-7B-2932IND         |
| 72 | TPP-6A              | TPP-6A_AL1              |
| 73 | Glu-A1              | gluA1.1_1594_ALG        |
| 74 | Glu-A1              | gluA1.1_1883_ALA        |
| 75 | GluD1               | Glu-D1d_SNP             |
| 76 | Pina-D1             | Pina-D1_INS             |
| 77 | Pinb2-V             | Pinb2-v2-3              |
| 78 | Pinb-D1             | Pinb-D1_INS             |
| 79 | Ppo-A1              | PPO-A1                  |
| 80 | Ppo-D1              | PPO-D1_SNP              |
| 81 | Psy-A1              | PsyA1-IND               |
| 82 | Tamby-A1            | Tamby10-A1              |
| 83 | Tamby-A1            | Tamby10-Nor17           |
| 84 | Tamby-B1            | TamybR B1a-b            |
| 85 | Tamby-D1            | TamybR D1a-b            |
| 86 | Sr26                | Sr26_R-dom_A            |
| 87 | Sr22                | Sr22_A_AL-Sus-T         |

|    |                |                             |
|----|----------------|-----------------------------|
| 88 | <i>Yr5</i>     | Y5/SPKASP3                  |
| 89 | <i>Yr5</i>     | Yr5                         |
| 90 | <i>Lr16</i>    | kwm849                      |
| 91 | <i>Lr23_BW</i> | <i>sunKASP_16</i>           |
| 92 | <i>SrCAD</i>   | Contig11536236_557_kwm999   |
| 93 | <i>SrCAD</i>   | Contig11536236_558_kwm1000  |
| 94 | <i>SrCAD</i>   | Kukri_rep_c68823_696_kwm987 |
| 95 | <i>SrCAD</i>   | 6DS_2105488_5581_kwm907     |
| 96 | <i>Stb6</i>    | cfn80047                    |
| 97 | <i>Stb6</i>    | cfn80048                    |
| 98 | <i>Stb6</i>    | cfn80050                    |

**Table S4. Distribution of WLR and MG according to botanical varieties**

| Botanical variety                           | Number of entries in the following material |         |         |    |
|---------------------------------------------|---------------------------------------------|---------|---------|----|
|                                             | WLR-AFG                                     | WLR-IRN | WLR-TUR | MG |
| 1. <i>Albidum</i>                           | 0                                           | 0       | 0       | 2  |
| 2. <i>Alborubrum</i>                        | 3                                           | 0       | 0       | 0  |
| 3. <i>Erythroleucon</i>                     | 3                                           | 2       | 10      | 2  |
| 4. <i>Erythroleucon-compactoides</i>        | 1                                           | 0       | 5       | 0  |
| 5. <i>Pseudo-erythroleucon-compactoides</i> | 0                                           | 0       | 1       | 0  |
| 6. <i>Erythroleucon-compactum</i>           | 0                                           | 0       | 3       | 0  |
| 7. <i>Erythrosperum</i>                     | 0                                           | 0       | 3       | 41 |
| 8. <i>Erythrosperum-compactoides</i>        | 0                                           | 0       | 1       | 0  |
| 9. <i>Erythrosperum-compactum</i>           | 0                                           | 0       | 1       | 0  |
| 10. <i>Ferrugineum</i>                      | 0                                           | 4       | 6       | 4  |
| 11. <i>Pseudo-ferrugineum</i>               | 0                                           | 0       | 2       | 0  |
| 12. <i>Ferrugineum-compactoides</i>         | 0                                           | 0       | 5       | 0  |
| 13. <i>Ferrugineum-compactum</i>            | 0                                           | 0       | 1       | 0  |
| 14. <i>Greacum</i>                          | 4                                           | 11      | 4       | 20 |
| 15. <i>Sub-greacum</i>                      | 1                                           | 0       | 0       | 0  |
| 16. <i>Pseudo-greacum</i>                   | 3                                           | 1       | 0       | 0  |
| 17. <i>Greacum-compactum</i>                | 0                                           | 0       | 2       | 0  |
| 18. <i>Pseudo-greacum-compactum</i>         | 0                                           | 0       | 1       | 0  |
| 19. <i>Leucopersicum</i>                    | 5                                           | 0       | 0       | 0  |
| 20. <i>Lutescens</i>                        | 0                                           | 0       | 0       | 4  |
| 21. <i>Meridionale</i>                      | 0                                           | 1       | 0       | 0  |
| Total number of botanical varieties         | 7                                           | 5       | 14      | 6  |

**Table S5. Agronomic parameters of wheat landraces and modern germplasm tested in Afghanistan, Iran and Turkey, 2018-2019.**

| Trait                       | Country, year | Wheat landraces (WLR) |             |             | Modern germplasm (MG) |             | All         |             |
|-----------------------------|---------------|-----------------------|-------------|-------------|-----------------------|-------------|-------------|-------------|
|                             |               | AFG                   | IRN         | TUR         | IRR                   | SA          | WLR         | MG          |
| Number of genotypes         |               | 20                    | 19          | 45          | 39                    | 34          | 84          | 73          |
| Days to heading from Jan. 1 | AFG-19        | 129                   | 131         | 138         | 130                   | 129         | 134         | 129         |
|                             | TUR-18        | 120                   | 118         | 123         | 121                   | 120         | 121         | 121         |
|                             | TUR-19        | 137                   | 139         | 143         | 140                   | 140         | 141         | 140         |
|                             | <b>Mean</b>   | <b>129</b>            | <b>129</b>  | <b>135</b>  | <b>130</b>            | <b>130</b>  | <b>132</b>  | <b>130</b>  |
| Plant height, cm            | AFG-19        | 108                   | 103         | 109         | 101                   | 104         | 107         | 103         |
|                             | TUR-18        | 83                    | 69          | 63          | 46                    | 61          | 69          | 54          |
|                             | TUR-19        | 105                   | 99          | 99          | 83                    | 91          | 100         | 88          |
|                             | <b>Mean</b>   | <b>99</b>             | <b>90</b>   | <b>90</b>   | <b>77</b>             | <b>85</b>   | <b>92</b>   | <b>82</b>   |
| Stripe rust, %              | AFG-19        | 20.5                  | 28.2        | 25.9        | 14.0                  | 12.3        | 25.1        | 14.7        |
|                             | TUR-18        | 45.8                  | 45.0        | 34.3        | 6.4                   | 4.2         | 32.3        | 5.5         |
|                             | <b>Mean</b>   | <b>33.2</b>           | <b>36.6</b> | <b>30.1</b> | <b>10.2</b>           | <b>8.3</b>  | <b>28.7</b> | <b>10.1</b> |
| Leaf rust, %                | TUR-18        | 62.5                  | 72.6        | 55.6        | 20.3                  | 20.3        | 61.1        | 23.8        |
|                             | TUR-19        | 51.5                  | 51.1        | 52.7        | 33.1                  | 32.2        | 52.0        | 34.5        |
|                             | <b>Mean</b>   | <b>57.0</b>           | <b>61.9</b> | <b>54.2</b> | <b>26.7</b>           | <b>26.3</b> | <b>56.6</b> | <b>29.2</b> |
| Lodging, %                  | <b>TUR-19</b> | <b>64.3</b>           | <b>94.2</b> | <b>74.0</b> | <b>1.5</b>            | <b>1.3</b>  | <b>76.2</b> | <b>1.9</b>  |
| Grain yield, kg/ha          | AFG-19        | 3529                  | 2626        | 3158        | 3422                  | 3782        | 3126        | 3574        |
|                             | IRN-19        | 1832                  | 2222        | 2180        | -                     | 2050        | 2078        | 2050        |
|                             | TUR-18        | 2825                  | 2724        | 2033        | 1574                  | 2414        | 2378        | 2073        |
|                             | TUR-19        | 3749                  | 3747        | 3355        | 4562                  | 4541        | 3538        | 4576        |
|                             | <b>Mean</b>   | <b>3327</b>           | <b>3090</b> | <b>2976</b> | <b>3221</b>           | <b>3519</b> | <b>3084</b> | <b>3381</b> |
| Spikes/0.25 m <sup>2</sup>  | TUR-19        | 153                   | 205         | 174         | 148                   | 152         | 175         | 149         |
| Spike length, cm            | TUR-18        | 9.3                   | 8.1         | 6.6         | 7.3                   | 8.6         | 7.5         | 8.0         |
|                             | TUR-19        | 8.1                   | 8.3         | 7.0         | 8.5                   | 8.2         | 7.6         | 8.3         |
|                             | <b>Mean</b>   | <b>8.7</b>            | <b>8.2</b>  | <b>6.8</b>  | <b>7.9</b>            | <b>8.4</b>  | <b>7.5</b>  | <b>8.1</b>  |
| Spikelets/spike             | TUR-18        | 17.9                  | 13.5        | 13.8        | 15.6                  | 17.7        | 14.6        | 16.6        |
|                             | TUR-19        | 16.6                  | 15.5        | 15.8        | 18.4                  | 18.6        | 16.0        | 18.4        |
|                             | <b>Mean</b>   | <b>17.3</b>           | <b>14.5</b> | <b>14.8</b> | <b>17.0</b>           | <b>18.2</b> | <b>15.3</b> | <b>17.5</b> |
| % of sterile spikelets      | TUR-18        | 9.1                   | 18.8        | 22.0        | 19.7                  | 11.2        | 18.5        | 15.0        |
|                             | TUR-19        | 19.4                  | 27.9        | 26.0        | 19.0                  | 20.2        | 24.9        | 19.6        |
|                             | <b>Mean</b>   | <b>14.3</b>           | <b>23.4</b> | <b>24.0</b> | <b>19.4</b>           | <b>15.7</b> | <b>21.7</b> | <b>17.3</b> |
| Grains/spike                | TUR-18        | 37.2                  | 18.4        | 17.2        | 24.2                  | 35.7        | 21.7        | 30.3        |
|                             | TUR-19        | 18.3                  | 13.0        | 12.8        | 22.3                  | 22.0        | 14.2        | 22.2        |
|                             | <b>Mean</b>   | <b>27.8</b>           | <b>15.7</b> | <b>15.0</b> | <b>23.3</b>           | <b>28.9</b> | <b>18.0</b> | <b>26.3</b> |
| 1000 kernel weight, gr      | IRN-19        | 34.6                  | 36.3        | 35.0        | -                     | 31.7        | 35.2        | 32.3        |
|                             | TUR-18        | 44.3                  | 48.6        | 41.8        | 35.2                  | 35.5        | 44.0        | 35.5        |
|                             | TUR-19        | 34.3                  | 37.1        | 32.0        | 29.6                  | 29.2        | 33.7        | 29.7        |
|                             | <b>Mean</b>   | <b>37.7</b>           | <b>40.7</b> | <b>36.3</b> | <b>32.5</b>           | <b>32.1</b> | <b>38.8</b> | <b>32.6</b> |

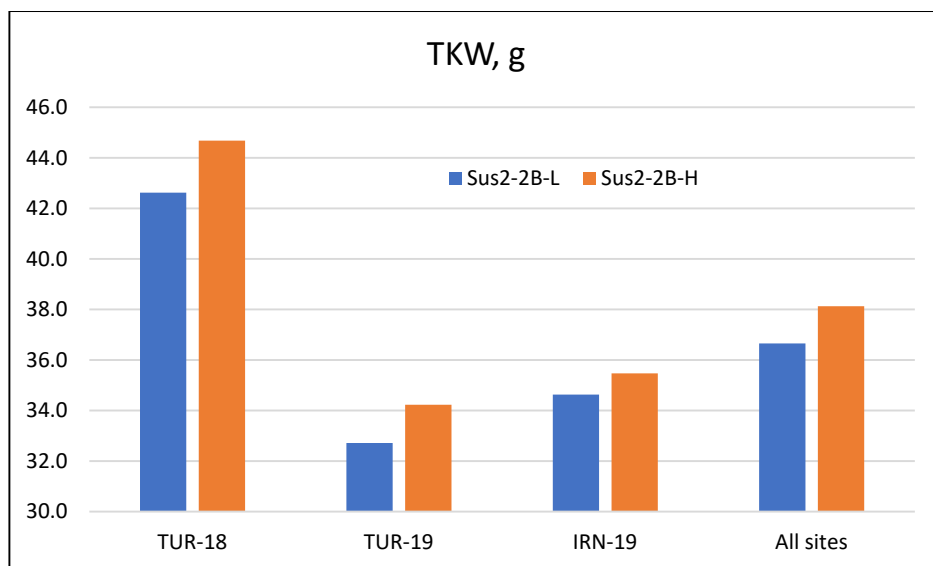

**Figure S1. 1000 kernel weight of wheat landraces possessing different Sus2-2B alleles.**
